# Supplementary material for: A Case-Only Study of Vulnerability to Heat Wave–Related Mortality in New York City (2000–2011)
Source: PubMed Central journal article supplement (PMC4492264; doi:10.1289/ehp.1408178), 2015-03-17

**Note to Readers:** *EHP* strives to ensure that all journal content is accessible to all readers. However, some figures and Supplemental Material published in *EHP* articles may not conform to 508 standards due to the complexity of the information being presented. If you need assistance accessing journal content, please contact [ehp508@niehs.nih.gov](mailto:ehp508@niehs.nih.gov). Our staff will work with you to assess and meet your accessibility needs within 3 working days.

## **Supplemental Material**

### **A Case-Only Study of Vulnerability to Heat Wave–Related Mortality in New York City (2000–2011)**

Jaime Madrigano,<sup>1</sup> Kazuhiko Ito,<sup>2</sup> Sarah Johnson,<sup>2</sup> Patrick L. Kinney,<sup>3</sup> and Thomas Matte<sup>2</sup>

#### **Table of Contents**

**Table S1.** Relative odds of dying during or immediately following a heat wave versus dying on other days during warm months for adults who had the characteristic or cause of death, compared with adults who did not, adjusted for seasonal variation<sup>a</sup>, NYC, 2000 – 2011.

**Table S2.** Relative odds of dying during or immediately following a heat wave versus dying on other days during warm months for adults who lived in a census tract (n=2216) with the characteristic, compared with adults who did not, adjusted for seasonal interaction<sup>a</sup>, NYC, 2000 – 2011.

**Table S3.** Relative odds of dying during or immediately following a heat wave versus dying on other days during warm months for adults who lived in a census tract with the characteristic, compared with adults who did not, using the 75<sup>th</sup> percentile cutpoint, NYC, 2000 – 2011.

**Figure S1.** Spatial distribution of neighborhood characteristics, NYC.

**Table S1.** Relative odds of dying during or immediately following a heat wave versus dying on other days during warm months for adults who had the characteristic or cause of death, compared with adults who did not, adjusted for seasonal variation<sup>a</sup>, NYC, 2000 – 2011.

| <b>Characteristic/Underlying Cause of Death</b>                 | <b>OR (95% CI)</b> |
|-----------------------------------------------------------------|--------------------|
| Male versus female                                              |                    |
| All heat wave days                                              | 0.98 (0.94, 1.01)  |
| All heat wave days plus 2 following days                        | 1.00 (0.97, 1.03)  |
| Black (non-Hispanic) versus other race/ethnicity                |                    |
| All heat wave days                                              | 1.07 (1.02, 1.11)  |
| All heat wave days plus 2 following days                        | 1.06 (1.03, 1.10)  |
| 65 years and older versus younger ages                          |                    |
| All heat wave days                                              | 0.99 (0.95, 1.04)  |
| All heat wave days plus 2 following days                        | 0.99 (0.96, 1.03)  |
| 85 years and older versus younger ages                          |                    |
| All heat wave days                                              | 1.01 (0.96, 1.05)  |
| All heat wave days plus 2 following days                        | 1.01 (0.98, 1.05)  |
| Born outside of the US versus within the US                     |                    |
| All heat wave days                                              | 0.97 (0.96, 1.04)  |
| All heat wave days plus 2 following days                        | 1.00 (0.97, 1.03)  |
| Dying at home versus dying in a hospital or institution         |                    |
| All heat wave days                                              | 1.10 (1.05, 1.15)  |
| All heat wave days plus 2 following days                        | 1.14 (1.10, 1.18)  |
| Cardiovascular disease versus other underlying cause of death   |                    |
| All heat wave days                                              | 0.95 (0.92, 0.99)  |
| All heat wave days plus 2 following days                        | 0.93 (0.90, 0.96)  |
| Myocardial Infarction versus other underlying cause of death    |                    |
| All heat wave days                                              | 1.02 (0.94, 1.11)  |
| All heat wave days plus 2 following days                        | 0.94 (0.88, 1.01)  |
| Congestive Heart Failure versus other underlying cause of death |                    |
| All heat wave days                                              | 1.15 (0.96, 1.38)  |
| All heat wave days plus 2 following days                        | 1.14 (0.98, 1.32)  |
| COPD versus other underlying cause of death                     |                    |
| All heat wave days                                              | 1.01 (0.89, 1.14)  |
| All heat wave days plus 2 following days                        | 0.92 (0.83, 1.02)  |

OR, odds ratio; CI, confidence interval.

<sup>a</sup>Models included a sine and cosine term to model season.

**Table S2.** Relative odds of dying during or immediately following a heat wave versus dying on other days during warm months for adults who lived in a census tract (n=2216) with the characteristic, compared with adults who did not, adjusted for seasonal interaction<sup>a</sup>, NYC, 2000 – 2011.

| <b>Census Tract Characteristic<sup>b</sup></b>                | <b>OR (95% CI)</b> |
|---------------------------------------------------------------|--------------------|
| High built space per area                                     |                    |
| All heat wave days                                            | 1.00 (0.96, 1.04)  |
| All heat wave days plus 2 following days                      | 1.01 (0.98, 1.04)  |
| High grass/shrubs                                             |                    |
| All heat wave days                                            | 0.97 (0.94, 1.01)  |
| All heat wave days plus 2 following days                      | 0.96 (0.93, 0.99)  |
| High trees                                                    |                    |
| All heat wave days                                            | 0.98 (0.94, 1.02)  |
| All heat wave days plus 2 following days                      | 0.97 (0.94, 1.00)  |
| High mean temperature (based on Landsat, daytime, summer)     |                    |
| All heat wave days                                            | 1.05 (1.01, 1.09)  |
| All heat wave days plus 2 following days                      | 1.03 (1.00, 1.07)  |
| High nighttime temperature <sup>c</sup>                       |                    |
| All heat wave days                                            | 1.03 (0.99, 1.07)  |
| All heat wave days plus 2 following days                      | 1.03 (0.99, 1.06)  |
| High % of households receiving public assistance <sup>d</sup> |                    |
| All heat wave days                                            | 1.04 (1.01, 1.08)  |
| All heat wave days plus 2 following days                      | 1.04 (1.01, 1.08)  |
| High % of non-English speaking <sup>e</sup>                   |                    |
| All heat wave days                                            | 1.00 (0.97, 1.04)  |
| All heat wave days plus 2 following days                      | 1.01 (0.98, 1.04)  |

OR, odds ratio; CI, confidence interval.

<sup>a</sup>Models included a sine and cosine term to model season. <sup>b</sup>All census tract characteristics were dichotomized at the median value, such that the OR compares tracts with  $\geq$  median vs. tracts  $<$  median.

<sup>c</sup>Data not available for 4 census tracts. <sup>d</sup>Data not available for 13 census tracts. <sup>e</sup>Data not available for 5 census tracts.

**Table S3.** Relative odds of dying during or immediately following a heat wave versus dying on other days during warm months for adults who lived in a census tract with the characteristic, compared with adults who did not, using the 75<sup>th</sup> percentile cutpoint, NYC, 2000 – 2011.

| <b>Census Tract Characteristic<sup>a</sup></b>                | <b>OR (95% CI)</b> |
|---------------------------------------------------------------|--------------------|
| High built space per area                                     |                    |
| <i>All heat wave days</i>                                     | 0.98 (0.94, 1.03)  |
| <i>All heat wave days plus 2 following days</i>               | 1.00 (0.97, 1.03)  |
| High grass / shrubs                                           |                    |
| <i>All heat wave days</i>                                     | 0.99 (0.94, 1.03)  |
| <i>All heat wave days plus 2 following days</i>               | 0.97 (0.94, 1.00)  |
| High trees                                                    |                    |
| <i>All heat wave days</i>                                     | 0.98 (0.93, 1.02)  |
| <i>All heat wave days plus 2 following days</i>               | 0.98 (0.95, 1.01)  |
| High mean temperature (based on Landsat, daytime, summer)     |                    |
| <i>All heat wave days</i>                                     | 1.06 (1.02, 1.11)  |
| <i>All heat wave days plus 2 following days</i>               | 1.06 (1.02, 1.09)  |
| High nighttime temperature <sup>b</sup>                       |                    |
| <i>All heat wave days</i>                                     | 0.97 (0.93, 1.01)  |
| <i>All heat wave days plus 2 following days</i>               | 0.99 (0.95, 1.02)  |
| High % of households receiving public assistance <sup>c</sup> |                    |
| <i>All heat wave days</i>                                     | 1.04 (1.00, 1.09)  |
| <i>All heat wave days plus 2 following days</i>               | 1.04 (1.00, 1.07)  |
| High % of non-English speaking <sup>d</sup>                   |                    |
| <i>All heat wave days</i>                                     | 1.00 (0.96, 1.04)  |
| <i>All heat wave days plus 2 following days</i>               | 1.00 (0.96, 1.03)  |

OR, odds ratio; CI, confidence interval.

<sup>a</sup>All census tract characteristics were dichotomized at the 75<sup>th</sup> percentile, such that the OR compares tracts with  $\geq 75^{\text{th}}$  percentile vs. tracts  $< 75^{\text{th}}$  percentile. <sup>b</sup>Data not available for 4 census tracts. <sup>c</sup>Data not available for 13 census tracts. <sup>d</sup>Data not available for 5 census tracts.

Figure S1. Spatial distribution of neighborhood characteristics, NYC.

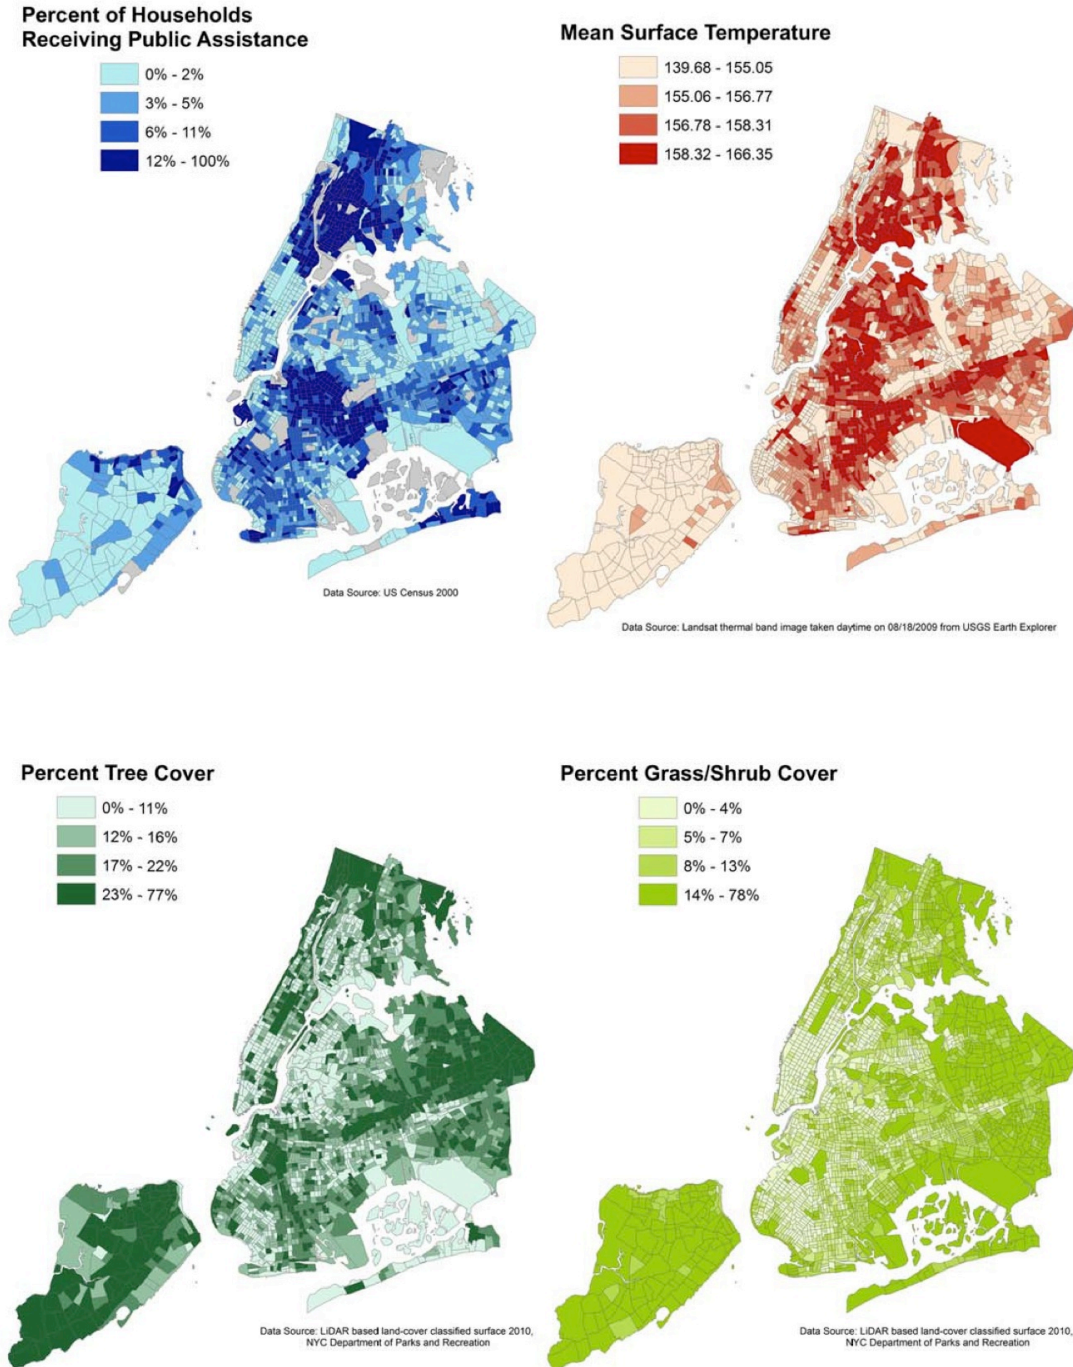

Supplement: ehp.1408178.s001.acco.pdf [file ehp.1408178.s001.acco.pdf]
